# Supplementary material for: Soft substrates drive optimal differentiation of human healthy and dystrophic myotubes
Source: Royal Society of Chemistry journal article supplement (doi:10.1039/b921401a), 2010-01-01
Supplement: b921401a.pdf [file b921401a.pdf]

## Supplementary figure

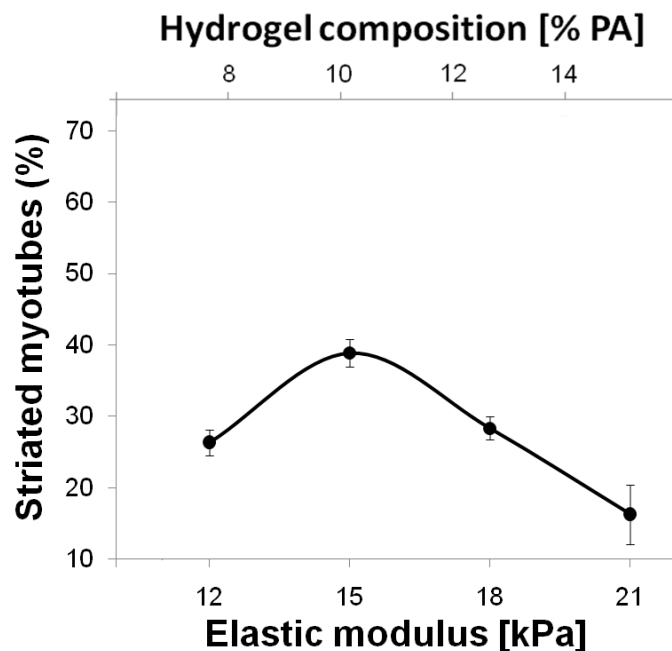

Supplementary Figure 1. **Optimum PAh elastic modulus for sarcomere formation on human healthy myotubes.** The graph reports the percentage of striated myotubes obtained from non dystrophic myoblasts after 7 days of culture with matrigel<sup>®</sup>. It shows the same trend followed by dystrophic myoblasts. The optimum was again reached onto hydrogel with  $E \approx 15 \text{ kPa}$ .
